# Supplementary material for: Combining ability and testcross performance of multi-nutrient maize under stress and non-stress environments
Source: PubMed Central journal article supplement (PMC9902879; doi:10.3389/fpls.2023.1070302), 2023-01-24
Supplement: Table_1.pdf [file Table_1.pdf]

**Supplementary Table 1: Ranking of genotypes for grain yield performance (t ha<sup>-1</sup>) under stress and non-stress conditions.**

| Entry (E) | GY OPT | Entry     | GY WW | Entry     | GY HMDS | Entry     | GY LN |
|-----------|--------|-----------|-------|-----------|---------|-----------|-------|
| <b>84</b> | 12.35  | <b>47</b> | 8.88  | <b>13</b> | 4.87    | <b>28</b> | 3.31  |
| <b>5</b>  | 11.34  | <b>63</b> | 8.82  | <b>73</b> | 4.80    | <b>35</b> | 3.20  |
| <b>82</b> | 11.24  | <b>36</b> | 8.78  | <b>28</b> | 4.74    | <b>11</b> | 3.20  |
| <b>83</b> | 10.65  | <b>7</b>  | 8.61  | <b>79</b> | 4.67    | <b>21</b> | 3.15  |
| <b>35</b> | 10.14  | <b>4</b>  | 8.59  | <b>7</b>  | 4.59    | <b>78</b> | 3.14  |
| <b>62</b> | 10.04  | <b>21</b> | 8.56  | <b>47</b> | 4.58    | <b>17</b> | 3.09  |
| <b>38</b> | 9.84   | <b>58</b> | 8.51  | <b>83</b> | 4.58    | <b>18</b> | 3.08  |
| <b>80</b> | 9.79   | <b>74</b> | 8.47  | <b>4</b>  | 4.43    | <b>10</b> | 3.07  |
| <b>6</b>  | 9.65   | <b>2</b>  | 8.39  | <b>74</b> | 4.40    | <b>83</b> | 3.03  |
| <b>10</b> | 9.63   | <b>69</b> | 8.37  | <b>11</b> | 4.30    | <b>5</b>  | 3.03  |
| <b>4</b>  | 9.49   | <b>84</b> | 8.29  | <b>49</b> | 4.25    | <b>26</b> | 2.97  |
| <b>33</b> | 9.43   | <b>26</b> | 8.25  | <b>26</b> | 4.24    | <b>54</b> | 2.94  |
| <b>1</b>  | 9.38   | <b>35</b> | 8.19  | <b>35</b> | 4.24    | <b>7</b>  | 2.91  |
| <b>69</b> | 9.36   | <b>77</b> | 8.14  | <b>54</b> | 4.22    | <b>3</b>  | 2.85  |
| <b>39</b> | 9.34   | <b>57</b> | 8.11  | <b>27</b> | 4.21    | <b>47</b> | 2.76  |
| <b>12</b> | 9.29   | <b>28</b> | 8.11  | <b>68</b> | 4.10    | <b>75</b> | 2.73  |
| <b>23</b> | 9.15   | <b>37</b> | 8.10  | <b>2</b>  | 4.05    | <b>82</b> | 2.69  |
| <b>13</b> | 9.11   | <b>55</b> | 8.01  | <b>42</b> | 4.04    | <b>19</b> | 2.66  |
| <b>9</b>  | 9.09   | <b>40</b> | 7.99  | <b>78</b> | 4.01    | <b>68</b> | 2.51  |
| <b>28</b> | 9.08   | <b>5</b>  | 7.97  | <b>82</b> | 4.00    | <b>84</b> | 2.50  |
| <b>68</b> | 8.97   | <b>14</b> | 7.96  | <b>56</b> | 3.99    | <b>61</b> | 2.38  |
| <b>79</b> | 8.80   | <b>83</b> | 7.91  | <b>38</b> | 3.98    | <b>69</b> | 2.36  |
| <b>40</b> | 8.78   | <b>61</b> | 7.86  | <b>58</b> | 3.88    | <b>33</b> | 2.26  |
| <b>42</b> | 8.77   | <b>68</b> | 7.79  | <b>62</b> | 3.82    | <b>57</b> | 2.25  |
| <b>36</b> | 8.76   | <b>10</b> | 7.73  | <b>21</b> | 3.82    | <b>13</b> | 2.23  |
| <b>21</b> | 8.72   | <b>8</b>  | 7.72  | <b>37</b> | 3.77    | <b>41</b> | 2.22  |
| <b>58</b> | 8.68   | <b>13</b> | 7.71  | <b>31</b> | 3.74    | <b>49</b> | 2.20  |
| <b>18</b> | 8.62   | <b>38</b> | 7.60  | <b>33</b> | 3.67    | <b>74</b> | 2.13  |
| <b>41</b> | 8.61   | <b>60</b> | 7.60  | <b>17</b> | 3.61    | <b>8</b>  | 2.07  |
| <b>48</b> | 8.56   | <b>73</b> | 7.60  | <b>3</b>  | 3.56    | <b>79</b> | 2.06  |
| <b>74</b> | 8.46   | <b>34</b> | 7.59  | <b>76</b> | 3.55    | <b>6</b>  | 2.04  |
| <b>27</b> | 8.34   | <b>44</b> | 7.46  | <b>22</b> | 3.54    | <b>55</b> | 2.03  |
| <b>7</b>  | 8.31   | <b>64</b> | 7.46  | <b>48</b> | 3.48    | <b>67</b> | 2.00  |
| <b>75</b> | 8.30   | <b>16</b> | 7.43  | <b>69</b> | 3.46    | <b>48</b> | 1.97  |
| <b>61</b> | 8.25   | <b>41</b> | 7.40  | <b>84</b> | 3.45    | <b>39</b> | 1.95  |
| <b>71</b> | 8.19   | <b>12</b> | 7.36  | <b>60</b> | 3.42    | <b>2</b>  | 1.95  |
| <b>77</b> | 8.17   | <b>79</b> | 7.35  | <b>19</b> | 3.38    | <b>81</b> | 1.94  |
| <b>20</b> | 8.09   | <b>19</b> | 7.34  | <b>23</b> | 3.36    | <b>1</b>  | 1.94  |
| <b>24</b> | 8.08   | <b>82</b> | 7.33  | <b>71</b> | 3.34    | <b>58</b> | 1.92  |
| <b>55</b> | 7.98   | <b>51</b> | 7.26  | <b>55</b> | 3.34    | <b>38</b> | 1.86  |
| <b>37</b> | 7.97   | <b>6</b>  | 7.26  | <b>14</b> | 3.30    | <b>16</b> | 1.86  |
| <b>67</b> | 7.94   | <b>17</b> | 7.26  | <b>24</b> | 3.28    | <b>59</b> | 1.84  |
| <b>34</b> | 7.93   | <b>56</b> | 7.25  | <b>51</b> | 3.24    | <b>73</b> | 1.81  |
| <b>31</b> | 7.93   | <b>42</b> | 7.20  | <b>43</b> | 3.23    | <b>4</b>  | 1.80  |
| <b>19</b> | 7.91   | <b>78</b> | 7.20  | <b>25</b> | 3.21    | <b>12</b> | 1.80  |
| <b>76</b> | 7.74   | <b>11</b> | 7.19  | <b>65</b> | 3.14    | <b>76</b> | 1.75  |
| <b>47</b> | 7.59   | <b>75</b> | 7.14  | <b>64</b> | 3.14    | <b>22</b> | 1.73  |
| <b>51</b> | 7.59   | <b>54</b> | 7.14  | <b>59</b> | 3.14    | <b>37</b> | 1.69  |

---

|           |      |           |      |           |      |           |      |
|-----------|------|-----------|------|-----------|------|-----------|------|
| <b>32</b> | 7.53 | <b>30</b> | 7.08 | <b>57</b> | 3.13 | <b>32</b> | 1.68 |
|-----------|------|-----------|------|-----------|------|-----------|------|

---

GY = Grain yield (t ha<sup>-1</sup>), OPT = optimum, WW = well-watered, HMDS = combined heat and drought, LN = managed low nitrogen conditions.
