# Supplementary material for: Combining ability and testcross performance of multi-nutrient maize under stress and non-stress environments
Source: PubMed Central journal article supplement (PMC9902879; doi:10.3389/fpls.2023.1070302), 2023-01-24
Supplement: Table_2.pdf [file Table_2.pdf]

Supplementary Table 2

| Environments       | Year | Season | Management       | Statistics | Traits    |           |
|--------------------|------|--------|------------------|------------|-----------|-----------|
|                    |      |        |                  |            | Zn        | Fe        |
| <b>CIMMYT</b>      | 2019 | Summer | Optimum          | Mean       | 30.7      | 29.7      |
|                    |      |        |                  | Range      | 12.9–46.7 | 11.3–55.1 |
|                    |      |        |                  | SD         | 6.4       | 8.2       |
| <b>ART Farm</b>    | 2019 | Summer | Optimum          | Mean       | 29.9      | 30.1      |
|                    |      |        |                  | Range      | 16.4–49.2 | 12.2–54.9 |
|                    |      |        |                  | SD         | 5.8       | 7.91      |
| <b>DR&amp;SS</b>   | 2019 | Summer | Managed Low N    | Mean       | 24.8      | 20.4      |
|                    |      |        |                  | Range      | 13.9–39.5 | 7.81–34.9 |
|                    |      |        |                  | SD         | 5.2       | 6.1       |
| <b>CHISUMBANJE</b> | 2020 | Summer | Heat and Drought | Mean       | 26.2      | 23.0      |
|                    |      |        |                  | Range      | 10.7–39.4 | 7.1–37.6  |
|                    |      |        |                  | SD         | 5.1       | 4.9       |
| <b>RARS</b>        | 2019 | Summer | Optimum          | Mean       | 30.5      | 29.9      |
|                    |      |        |                  | Range      | 17.3–45.3 | 12.6–58.4 |
|                    |      |        |                  | SD         | 5.9       | 8.1       |
| <b>GWEBI</b>       | 2019 | Summer | Optimum          | Mean       | 30.4      | 30.8      |
|                    |      |        |                  | Range      | 15.6–57.8 | 12.5–54.4 |
|                    |      |        |                  | SD         | 6.3       | 7.7       |
| <b>CHISUMBANJE</b> | 2020 | Winter | Well-Watered     | Mean       | 25.2      | 23.1      |
|                    |      |        |                  | Range      | 12.4–36.6 | 9.2–37.1  |
|                    |      |        |                  | SD         | 4.9       | 6.1       |
| <b>CHIREDDZI</b>   | 2020 | Winter | Heat and Drought | Mean       | 25.1      | 21.1      |
|                    |      |        |                  | Range      | 12.1–36.8 | 7.9–42.8  |
|                    |      |        |                  | SD         | 5.2       | 6.1       |
| <b>CHIREDDZI</b>   | 2020 | Winter | Well-Watered     | Mean       | 28.3      | 31.5      |
|                    |      |        |                  | Range      | 13.3–38.5 | 10.5–34.9 |
|                    |      |        |                  | SD         | 4.7       | 6.5       |
| <b>CIMMYT</b>      | 2019 | Summer | Managed Low N    | Mean       | 23.5      | 22.6      |
|                    |      |        |                  | Range      | 16.4–34.8 | 9.7–33.8  |
|                    |      |        |                  | SD         | 3.5       | 4.4       |

Zn = grain zinc concentration (mg kg<sup>-1</sup>); Fe = Grain iron concentration (mg kg<sup>-1</sup>), SD = Standard deviation.
